# Supplementary material for: Ruthenium sensitizer with a thienylvinylbipyridyl ligand for dye-sensitized solar cells
Source: Royal Society of Chemistry journal article supplement (doi:10.1039/c1dt10210a), 2011-01-01
Supplement: c1dt10210a.pdf [file c1dt10210a.pdf]

## Supporting Information

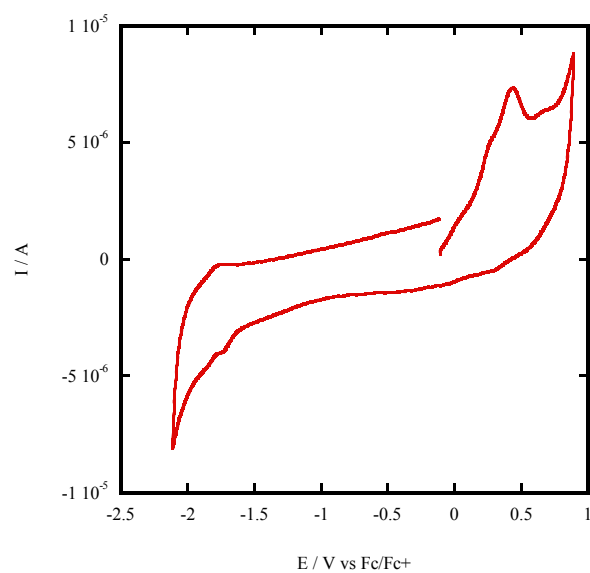

Fig. S1: Cyclic voltammogram of the complex YX360 (1.0 mM) in AN with 0.1 M *n*Bu<sub>4</sub>N[PF<sub>6</sub>]

at a scan rate of 100 mV s<sup>-1</sup>.

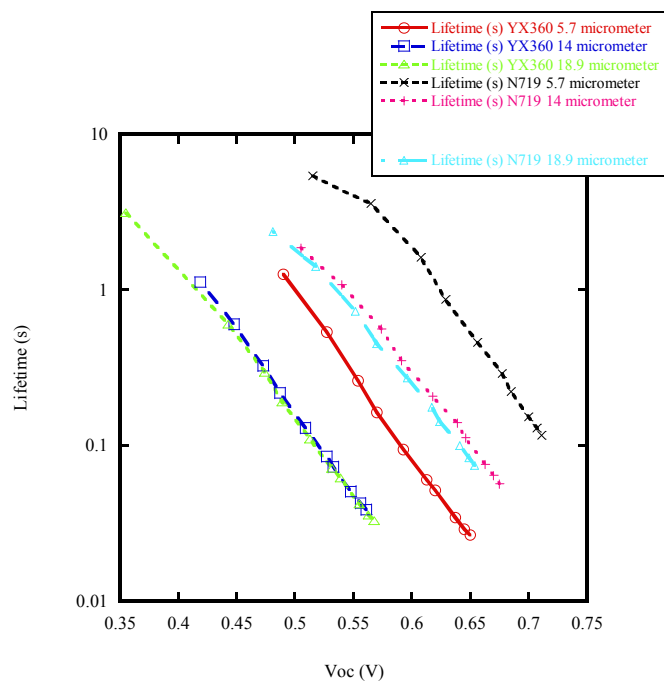

Fig. S2: Electron lifetime as a function of  $V_{oc}$  for the dyes YX360 and N719 at three different film thicknesses.

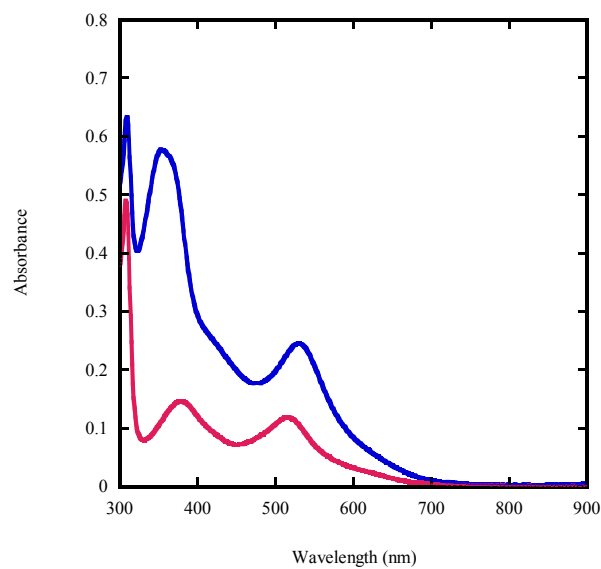

Fig. S3: Absorption spectra of YX360 (blue line) and N719 (red line) for dye-loading in methanol.

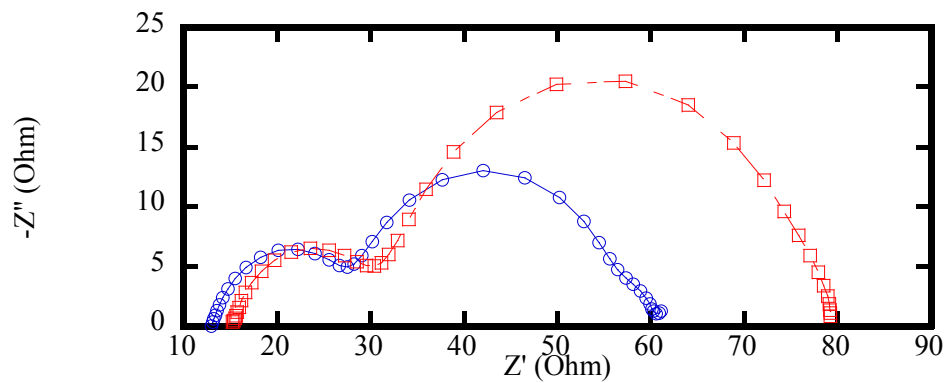

Fig.S4: Impedance spectra of DSCs under illumination for DSCs containing the dyes YX360 (blue) and N719 (red). Note that the cells investigated were analogous but not the same as the one used for recording  $I-V$  data.
